CORRECTION

# Correction: Structural Perturbations to Population Skeletons: Transient Dynamics, Coexistence of Attractors and the Rarity of Chaos

Brajendra K. Singh, Paul E. Parham, Chin-Kun Hu

The images for Figs 4 and 5 are incorrectly switched. The image that appears as Fig 4 should be Fig 5, and the image that appears as Fig 5 should be Fig 4. The figure captions appear in the correct order.

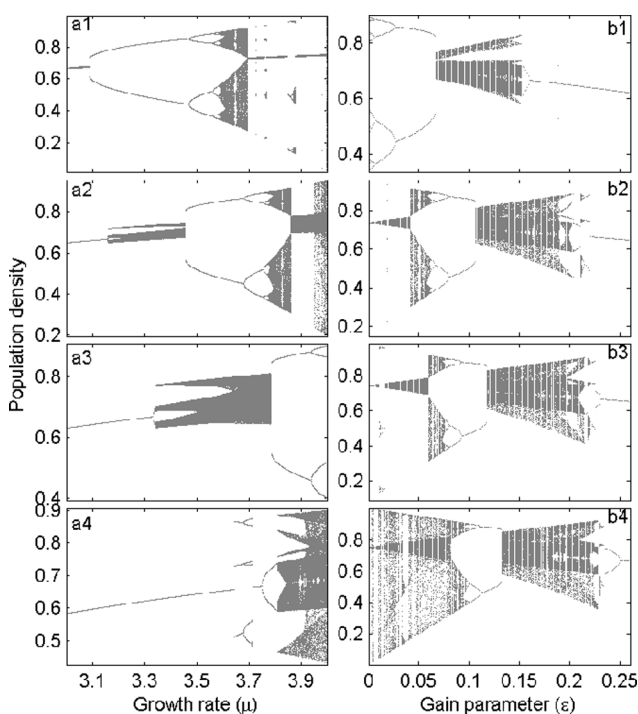

**Fig 4. Changing patterns of long-term dynamics.** Here, the bifurcation plots are obtained by plotting the resident population densities from the last 200 generations after discarding transient dynamics. Both bifurcation parameters  $3 \leq \mu \leq 4$  (left) and  $0 \leq \varepsilon \leq 0.26$  (right) are incremented with a stepsize of 0.001. The left-panel plots are for different values of the gain parameter  $\varepsilon = 0.005$  (a1), 0.05 (a2), 0.1 (a3) and 0.2 (a4). The right-panel plots are for  $\mu = 3.57$  (b1),  $\mu = 3.83$  (b2),  $\mu = 3.9$  (b3) and  $\mu = 4$  (b4).

doi:10.1371/journal.pone.0157617.g001

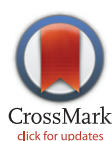

## OPEN ACCESS

**Citation:** Singh BK, Parham PE, Hu C-K (2016) Correction: Structural Perturbations to Population Skeletons: Transient Dynamics, Coexistence of Attractors and the Rarity of Chaos. PLoS ONE 11(6): e0157617. doi:10.1371/journal.pone.0157617

**Published:** June 10, 2016

**Copyright:** © 2016 Singh et al. This is an open access article distributed under the terms of the [Creative Commons Attribution License](https://creativecommons.org/licenses/by/4.0/), which permits unrestricted use, distribution, and reproduction in any medium, provided the original author and source are credited.

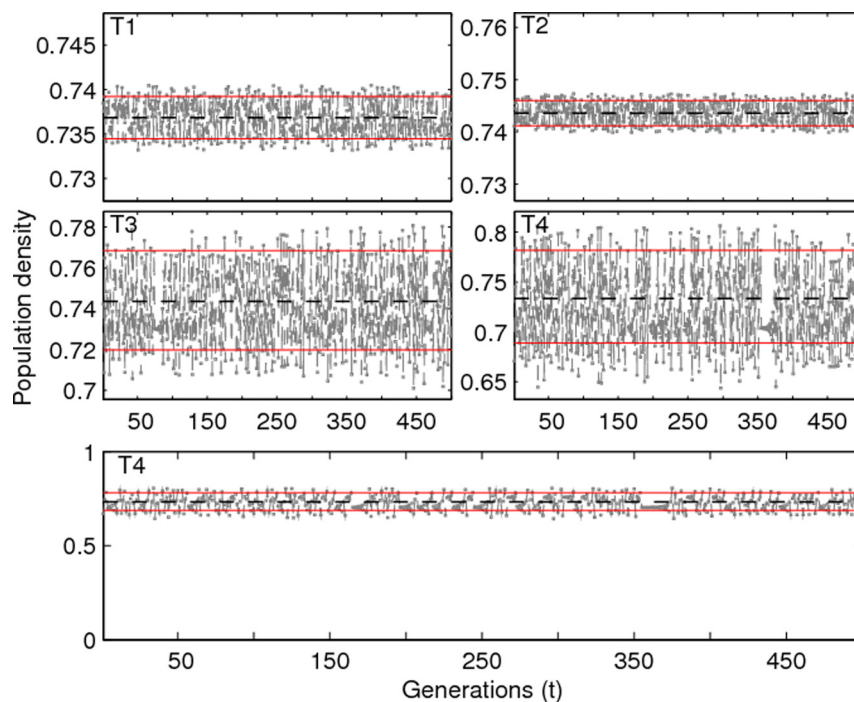

**Fig 5. Illustration of Non-chaotic Aperiodic Oscillations (NAO).** Time series are for different combinations of the gain parameter  $\varepsilon$  and growth rate  $\mu$ : (T1)  $\varepsilon = 0.005$ ,  $\mu = 3.8$ ; (T2)  $\varepsilon = 0.005$ ,  $\mu = 3.9$ ; (T3)  $\varepsilon = 0.05$ ,  $\mu = 3.9$  and (T4)  $\varepsilon = 0.1$ ,  $\mu = 3.75$ . Only 500 generations are used in all four plots after discarding transients. Two horizontal lines are given by  $\bar{x}_{up} = \frac{1}{(1-\varepsilon)} \left(1 - \frac{1}{\mu(1-\varepsilon)}\right)$  and  $\bar{x}_{low} = \frac{1}{(1+\varepsilon)} \left(1 - \frac{1}{\mu(1+\varepsilon)}\right)$ . The two values are derived from the analysis of the simplified version of (2) for  $n = 1$  and  $n = 0$ , respectively. The time series T4 is plotted on a different y-scale to emphasize small fluctuations in the time series. The dashed-line represents the unstable fixed point of the map with  $\varepsilon = 0$ .

doi:10.1371/journal.pone.0157617.g002

## Reference

1. Singh BK, Parham PE, Hu C-K (2011) Structural Perturbations to Population Skeletons: Transient Dynamics, Coexistence of Attractors and the Rarity of Chaos. PLoS ONE 6(9): e24200. doi:[10.1371/journal.pone.0024200](https://doi.org/10.1371/journal.pone.0024200) PMID: [21980342](https://pubmed.ncbi.nlm.nih.gov/21980342/)
